# Supplementary material for: Development and Validity Testing of the Medical Student Artificial Intelligence Information Literacy Scale (MS-AIILS)
Source: Research Square preprint supplement (doi:10.21203/rs.3.rs-7327894/v1), 2025-09-10
Supplement: Supplementary file 1 [file 2cc319c5c67227909d5db370.pdf]

### Medical Student Artificial Intelligence Information Literacy Scale (MS-AIILS)

| Dimension                           | Num<br>be | entry                                                                                                                                                            | 5 | 4 | 3 | 2 | 1 |
|-------------------------------------|-----------|------------------------------------------------------------------------------------------------------------------------------------------------------------------|---|---|---|---|---|
| Identifying<br>information<br>needs | 1         | I am familiar with the typical applications of artificial intelligence in the medical field, such as disease diagnosis assistance and nursing assessment.        |   |   |   |   |   |
|                                     | 2         | I can identify the support that AI tools can provide during medical studies.                                                                                     |   |   |   |   |   |
|                                     | 3         | I can identify the specific problems that require AI tools to solve in clinical practice.                                                                        |   |   |   |   |   |
|                                     | 4         | I can determine the specific areas and stages where AI tools can play a supportive role within multidisciplinary teams.                                          |   |   |   |   |   |
| Obtaining<br>information            | 5         | I can retrieve authoritative literature in the field of medical AI through database searches.                                                                    |   |   |   |   |   |
|                                     | 6         | I can access the latest advancements in AI technology in the medical field through online resources.                                                             |   |   |   |   |   |
|                                     | 7         | I can select appropriate artificial intelligence learning platforms or tools to retrieve medical-related information based on course learning needs.             |   |   |   |   |   |
|                                     | 8         | I can obtain the latest research results in this field by participating in artificial intelligence seminars, academic conferences, and other activities.         |   |   |   |   |   |
|                                     | 9         | I can adjust my search strategy based on feedback from search results to obtain more accurate artificial intelligence-related information.                       |   |   |   |   |   |
| Evaluating<br>information           | 10        | I can judge whether the medical knowledge provided by artificial intelligence tools is consistent with authoritative textbooks or the latest research.           |   |   |   |   |   |
|                                     | 11        | I can assess whether the case analyses provided by AI tools are based on reliable clinical data and evidence.                                                    |   |   |   |   |   |
|                                     | 12        | I can identify the limitations of AI tools in professional learning and practice and consider them in decision-making.                                           |   |   |   |   |   |
|                                     | 13        | I can determine the applicability and effectiveness of different AI tools in medical learning scenarios (such as theoretical learning and practical operations). |   |   |   |   |   |
|                                     | 14        | I can assess the accuracy and reliability of medical information provided by AI tools.                                                                           |   |   |   |   |   |
| Using<br>information                | 15        | I can use appropriate AI tools to perform preliminary processing and analysis of learning cases or medical experimental data.                                    |   |   |   |   |   |
|                                     | 16        | I can effectively apply the information provided by AI tools to medical coursework, exam review, and other learning activities.                                  |   |   |   |   |   |
|                                     | 17        | I can collaborate with other students to use AI to complete                                                                                                      |   |   |   |   |   |

|  |    |                                                                                                                                                                                                   |  |  |  |  |  |
|--|----|---------------------------------------------------------------------------------------------------------------------------------------------------------------------------------------------------|--|--|--|--|--|
|  |    | medical-related assignments or research projects.                                                                                                                                                 |  |  |  |  |  |
|  | 18 | I understand the ethical guidelines for using AI in medical learning (such as patient privacy and academic misconduct).                                                                           |  |  |  |  |  |
|  | 19 | I understand the legal guidelines involved in using AI in professional learning and clinical practice (such as data security and intellectual property rights) to ensure compliance with the law. |  |  |  |  |  |
