# Supplementary material for: Development and Validity Testing of the Medical Student Artificial Intelligence Information Literacy Scale (MS-AIILS)
Source: Research Square preprint supplement (doi:10.21203/rs.3.rs-7327894/v1), 2025-09-10
Supplement: Supplementary file 2 [file c27f83c508b8f43d245f5d40.pdf]

# Interview Guide for Medical Student Artificial Intelligence Information Literacy

## Study Purpose of the Interview

### **Purpose of the Interview**

The purpose of this interview is to gain an in-depth understanding of medical students' experiences, challenges, and needs related to artificial intelligence information literacy. This guide provides a structured approach to ensure consistency and comprehensiveness in data collection.

### **Interview Questions**

①What do you currently know about "AI applications in the medical field" (e.g., image recognition, case analysis, etc.)?

②When searching for research materials on AI in the medical field (e.g., literature, case studies), what channels do you typically use to obtain information?

③When assessing the reliability of medical AI-related information (e.g., algorithm results, application reports), what key points do you focus on?

④Have you ever tried using medical AI tools (e.g., diagnostic assistance software, intelligent learning platforms)? What advantages or challenges did you encounter in terms of operation or understanding during use?

⑤Based on your medical studies or practice (e.g., internships, research), what AI information skills do you believe medical students need to better adapt to future work?

⑥In terms of improving AI information literacy, what support would you like schools or courses to provide? For example, specialized training, practical opportunities, or related resources.
